# Supplementary material
Source: publisher figshare collection journal article supplement (https://acs.figshare.com/ndownloader/files/5214817)

## Supplementary Material

### 1. The proton NMR spectrum for the disulfide derivative of MCH.

<sup>1</sup>H normal range AV300

after I2 in CDCl<sub>3</sub>

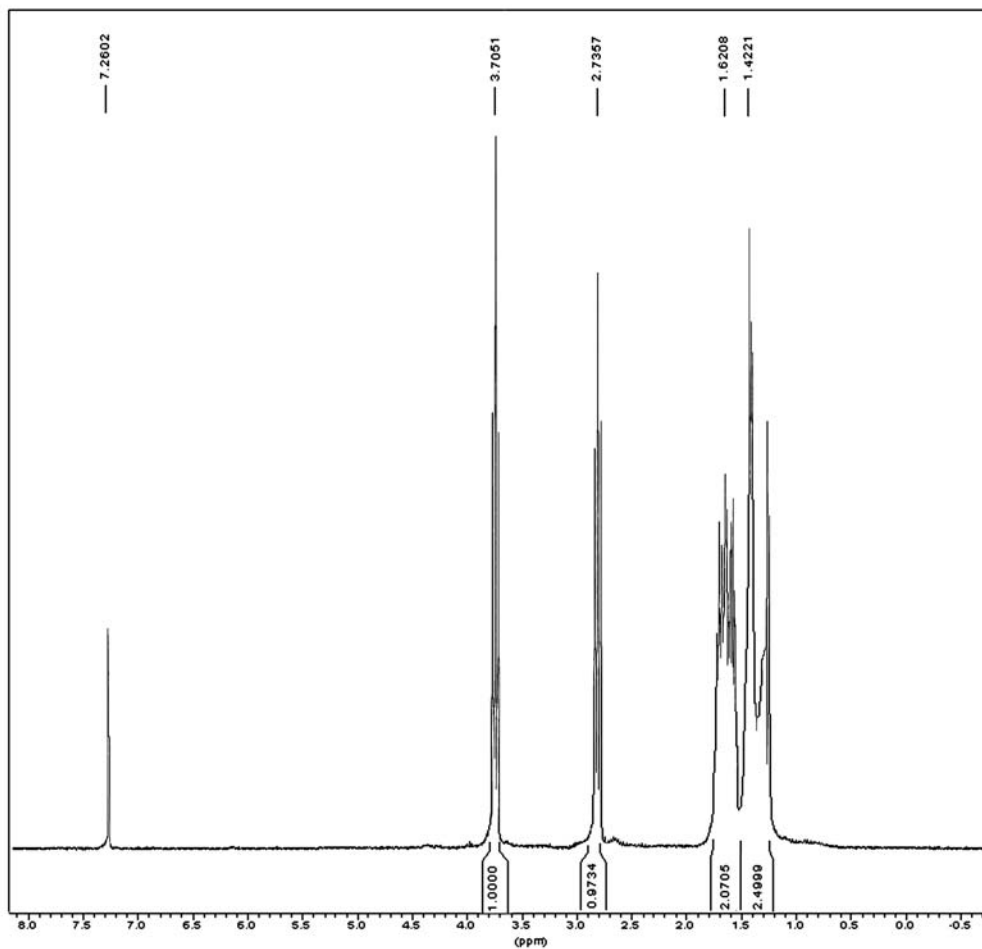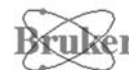

\*\*\* Current Data Parameters \*\*\*

NAME : jl27zhan  
EXPNO : 2  
PROCNO : 1

\*\*\* Acquisition Parameters \*\*\*

BF1 : 300.1300000 MHz  
DATE\_d : Jul 26 2006  
NS : 8  
NUCLEUS : off  
PULPROG : zg30  
SFO1 : 300.1318534 MHz  
SOLVENT : CDCl<sub>3</sub>  
SW : 17.9519 ppm  
TD : 32768  
TE : 300.0 K

\*\*\* Processing Parameters \*\*\*

LB : 0.30 Hz  
SF : 300.1300116 MHz  
SI : 32768

\*\*\* 1D NMR Plot Parameters \*\*\*

SR : 11.64 Hz  
NUCLEUS : off



## 2. The disulfide derivative of MCH containing the ONO group

<sup>1</sup>H normal range AC300

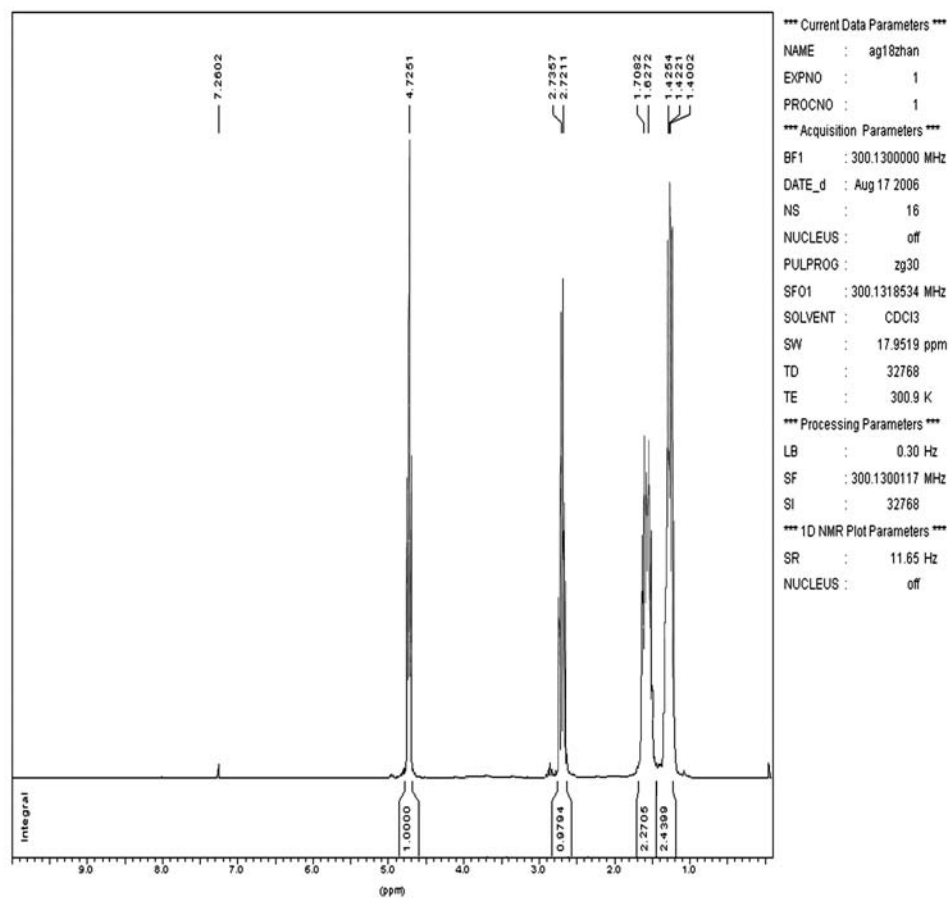

### 3. The disulfide derivative of MCH containing the CHO group

<sup>1</sup>H normal range AV300

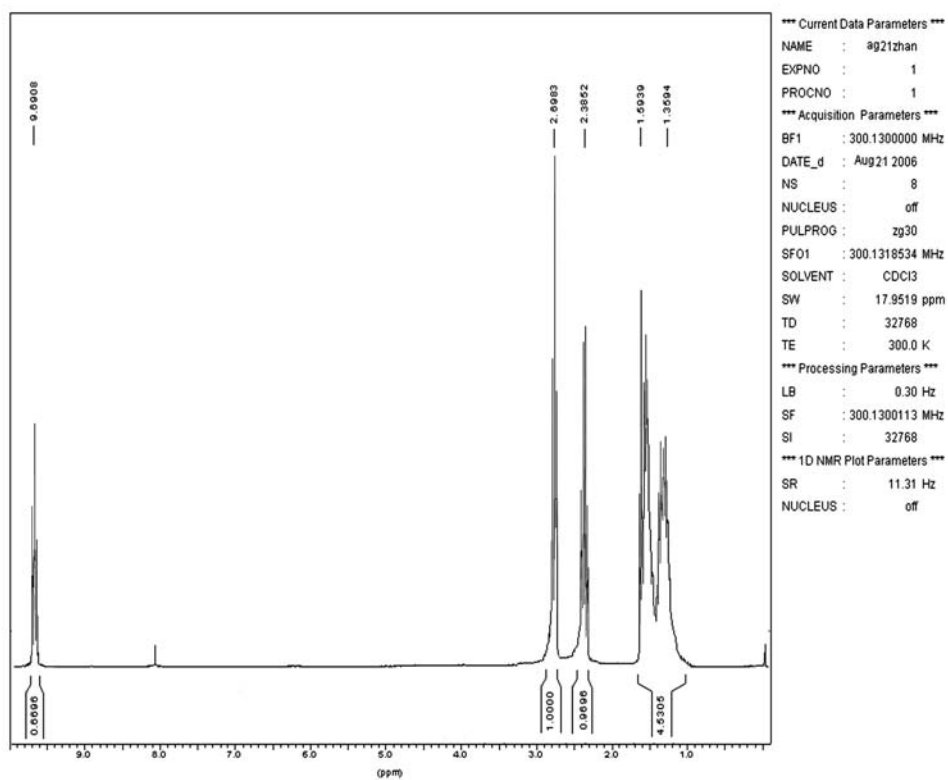

#### 4. The disulfide derivative of MCH containing the NCS group

<sup>1</sup>H normal range AV300

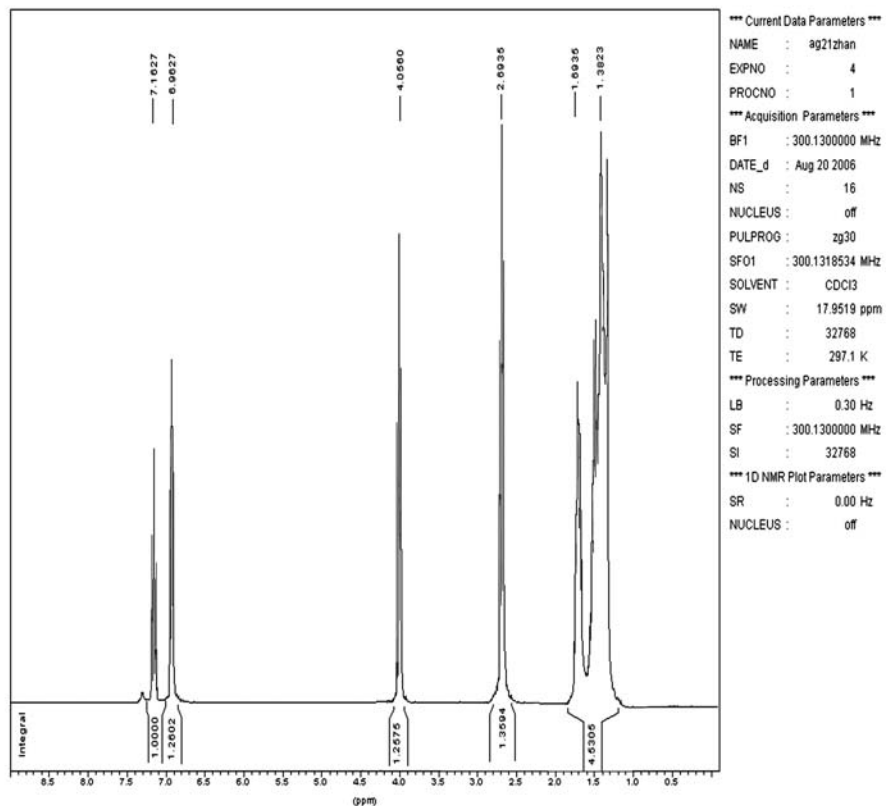

Supplement: Supplementary file 1 [file 5214817]
